## ACID–BASE REGULATION IN TADPOLES OF *RANA CATESBEIANA* EXPOSED TO ENVIRONMENTAL HYPERCAPNIA

MORTEN BUSK<sup>1,\*</sup>, ERIK HVIID LARSEN<sup>2</sup> AND FRANK B. JENSEN<sup>1</sup>

<sup>1</sup>*Institute of Biology, Odense University, DK-5230 Odense M, Denmark* and <sup>2</sup>*Zoophysiological Laboratory A, August Krogh Institute, Copenhagen University, DK-2100 Copenhagen Ø, Denmark*

Accepted 17 July 1997

### Summary

Tadpoles of *Rana catesbeiana* were exposed to different levels of environmental hypercapnia. The acid–base regulatory response differed from that in adult amphibians in showing a high degree of pH compensation in the extracellular fluid (65–85%) and complete compensation in the intracellular fluid (tail muscle and liver) within 24 h. Hypercapnia induced a massive transfer of  $\text{HCO}_3^-$  equivalents and  $\text{Ca}^{2+}$  from the tadpoles to the environment, which lasted some 4–6 h. Bicarbonate accumulated in the body fluids came mainly from internal buffer sources (probably  $\text{CaCO}_3$  in lime sacs and/or skin deposits). It is suggested that the large bicarbonate efflux from the animal is a consequence of the dissolution of  $\text{CaCO}_3$  stores and the

delayed adjustment of bicarbonate-retaining mechanisms. Re-exposure of tadpoles to hypercapnia after 1–3 weeks of normocapnic recovery only affected transepithelial fluxes of acid–base equivalents marginally, suggesting that mobilisable  $\text{CaCO}_3$  stores were depleted during the first exposure to hypercapnia and that they were not refilled. The  $\text{CaCO}_3$  stores may normally be mobilised during the slowly developing internal hypercapnia that occurs during metamorphosis.

Key words: acid–base regulation, hypercapnia, pH compensation, fixed buffer resources, transfer of acid–base equivalents, *Rana catesbeiana*.

### Introduction

In adult amphibians, exposure to environmental hypercapnia generally leads only to a partial (0–30%) extracellular pH compensation (Boutilier *et al.* 1992). Aquatic species such as *Xenopus laevis* (Toews and Boutilier, 1986), *Siren lacertina*, *Amphiuma means* (Heisler *et al.* 1982) and *Necturus maculosus* (Stiffler *et al.* 1983) do not elevate plasma  $[\text{HCO}_3^-]$  during hypercapnia. *Siren lacertina* and *Amphiuma means* do, however, compensate the hypercapnic acidosis in the intracellular compartments to a high degree (Heisler *et al.* 1982). The priority for intracellular pH regulation makes sense since it is the intracellular space that contains pH-sensitive enzymes.

Tadpoles experience a slowly developing internal hypercapnia during their metamorphosis when a transition from water- to air-breathing occurs. The potential respiratory acidosis associated with the rise in  $P_{\text{CO}_2}$  is almost completely compensated in the extracellular fluid (Just *et al.* 1973). Intra- and extracellular acid–base regulation in tadpoles during environmental hypercapnia has not been examined but is of interest in view of the large internal pool of carbonates in the paravertebral lime sacs (Pilkington and Simkiss, 1966) and the skin (Baldwin and Bentley, 1980), which provides tadpoles with the opportunity for mobilising buffer base. The main objectives of the present study were to investigate the

acid–base balance in selected body compartments of tadpoles during environmental hypercapnia and to estimate the contribution of body  $\text{CaCO}_3$  reserves to acid–base compensation.

### Materials and methods

#### *Experimental animals*

Field-collected tadpoles of *Rana catesbeiana* (Shaw) were air-shipped from North Carolina Biological Supply Company, USA, in July (mass range of individuals 4–13 g, most weighed between 6 and 8 g) and in November (mass range 2.5–4.5 g). All tadpoles were acclimated for at least 7 days at 18–20 °C to aerated tap water. Some of the tadpoles obtained in July were acclimated to Copenhagen tap water with the following ionic composition ( $\text{mmol l}^{-1}$ ):  $[\text{Ca}^{2+}] = 3.2$ ,  $[\text{Na}^+] = 1.7$ ,  $[\text{K}^+] = 0.16$ ,  $[\text{Cl}^-] = 3.5$  and  $[\text{HCO}_3^-] = 4.0$ . Other tadpoles obtained in July and all tadpoles obtained in November were acclimated to Odense tap water with the same ionic composition except that  $[\text{Cl}^-] = 1.7 \text{ mmol l}^{-1}$  and  $[\text{HCO}_3^-] = 5.4 \text{ mmol l}^{-1}$ . Experiments were performed in the same type of water as used for acclimation. Tadpoles were fed boiled spinach until 2 days before experimentation. All tadpoles were in developmental stages XIV–XIX as defined by Taylor and Kollros (1946).

\*Author for correspondence (e-mail: busk@biology.ou.dk).

*Experimental protocol*

Tadpoles were randomly selected to form six experimental groups. Individual tadpoles were placed in a chamber with 1.5 l of aerated normocapnic tap water at 20 °C. After 4 h, the animals were subjected to different levels of hypercapnia by bubbling humidified CO<sub>2</sub>/air gas mixtures, delivered by Wösthoff (Bochum, Germany) gas-mixing pumps, through the water. The six experimental treatments were as follows: (i) 24 h of exposure to normoxic-normocapnic water; (ii) 2 h of exposure to 2 % CO<sub>2</sub>; (iii) 24 h at 2 % CO<sub>2</sub>; (iv) 2 h at 5 % CO<sub>2</sub>; (v) 24 h at 5 % CO<sub>2</sub>; and (vi) 48 h at 5 % CO<sub>2</sub> followed by 24 h at 8 % CO<sub>2</sub>. At the end of the exposures, the tadpoles were anaesthetised by adding a NaHCO<sub>3</sub>-buffered (pH 7) solution of MS 222 (final concentration 0.25 g l<sup>-1</sup>) to the experimental chamber. Following complete anaesthesia (3–8 min), the tail muscle was quickly cut off, freeze-clamped and stored in liquid nitrogen for later analysis of acid–base parameters. To minimise sampling time, no effort was made to remove the tail skin (except for the dorsal and ventral fins, which could be easily removed after freeze-clamping). Because of the small size of the tadpoles, it was difficult to obtain blood by heart puncture. Instead, after cutting the tail, a blood sample was taken from the dorsal aorta into a heparinized capillary tube. To overcome occasional problems with clotting, each capillary was mounted in an ice-cooled cylinder. Approximately 50–125 µl of blood was obtained from tadpoles weighing more than 4 g, and the sampling method allowed tail tissue and blood samples to be collected in under 30 s. The liver was removed from some of the tadpoles subjected to treatments i, ii and iii and freeze-clamped for later measurement of intracellular pH.

In a separate experimental series, tadpoles were exposed for 24 h to normoxic-normocapnic or hypercapnic (5 % CO<sub>2</sub>) conditions. Pieces of tail muscle were weighed, placed on a small meshed net mounted in the bottom of a test tube, centrifuged for 4 min at 1000 g and then reweighed, allowing estimation of extracellular fluid (interstitial fluid + blood) volume according to the simple method developed by Ling and Walton (1975). The spun-off extracellular fluid was collected for determination of calcium concentration. The centrifuged muscle tissue was dried to a constant mass (24 h at 95 °C) and reweighed to evaluate fractional tissue water content ( $F_{tw}$ ) and fractional extracellular water content ( $Q$ ). For determination of intracellular Ca<sup>2+</sup> concentration, the dried muscle samples were digested in 65 % HNO<sub>3</sub>, bleached in H<sub>2</sub>O<sub>2</sub>, and finally redissolved in 0.2 % HNO<sub>3</sub>.

In a further experimental series, the net fluxes of acid–base equivalents and Ca<sup>2+</sup> between the animals and the environment were determined in tadpoles exposed to (i) 28 h of normocapnia and (ii) 4 h of normocapnia followed by 24 h at 5 % CO<sub>2</sub>. Transepithelial transfer of acid–base equivalents was measured using a ΔHCO<sub>3</sub><sup>-</sup> system (Heisler, 1989). Four tadpoles with a total mass of 13–16 g were placed in the experimental chamber. The total water volume was 550 ml, resulting in a water/animal volume ratio of 33–42, which is

higher than the recommended ratio of 6–15 (Heisler, 1989), but was found necessary in order to avoid undue accumulation of ammonia. The water was pumped from the chamber through the ΔHCO<sub>3</sub><sup>-</sup> system, consisting of three glass columns in which the water was equilibrated to 1 % CO<sub>2</sub>, and then to a pH electrode chamber. Before being returned to the animal chamber, the water passed through a fourth glass column, where it was equilibrated with the same gas mixture as used in the animal chamber. The whole system, including the electrode chamber, was thermostatted at 20±0.5 °C. Changes in water bicarbonate concentration were calculated from P<sub>CO<sub>2</sub></sub>, the measured pH and values of the solubility coefficient for CO<sub>2</sub> (α<sub>CO<sub>2</sub></sub>) and pK' adopted from Maas *et al.* (1984). The reliability of calculated Δ[HCO<sub>3</sub><sup>-</sup>] values was verified by adding known amounts of NaHCO<sub>3</sub> to the system. For determination of net fluxes of ammonia and Ca<sup>2+</sup>, water samples were collected at times -3, 0 (onset of hypercapnia), 3 and 24 h. After having been exposed to hypercapnia for 24 h, the tadpoles were allowed to recover for 1–3 weeks in normocapnic water. The animals were then re-exposed to hypercapnia (5 % CO<sub>2</sub>), and the transepithelial fluxes of acid–base equivalents and Ca<sup>2+</sup> were again measured.

*Analytical procedures*

Blood pH was measured by sucking blood directly from the sampling capillary tube into the capillary pH electrode of a Radiometer (Copenhagen, Denmark) BMS 3 electrode assembly thermostatted at 20 °C. Total CO<sub>2</sub> (C<sub>CO<sub>2</sub></sub>) in true plasma and whole blood was determined using the Cameron (1971) method. In some tadpoles, only whole-blood C<sub>CO<sub>2</sub></sub> measurements were performed. To present all the data in Davenport diagrams, whole-blood C<sub>CO<sub>2</sub></sub> values were converted to plasma values using the following regression equation: blood C<sub>CO<sub>2</sub></sub>/plasma C<sub>CO<sub>2</sub></sub> = -0.0792pH + 1.464 ( $P < 0.02$ ,  $r^2 = 0.3$ ), which is based on measurements of pH and C<sub>CO<sub>2</sub></sub> in the whole blood and true plasma of 30 tadpoles. Blood P<sub>CO<sub>2</sub></sub> and [HCO<sub>3</sub><sup>-</sup>] were calculated using the Henderson–Hasselbalch equation. The plasma pK' and CO<sub>2</sub> solubility coefficient (α<sub>CO<sub>2</sub></sub>) were calculated using the formulae of Heisler (1989).

Intracellular pH (pHi), C<sub>CO<sub>2</sub></sub> in tail muscle tissue and pHi in liver were determined according to the method of Pörtner *et al.* (1990). Metabolism was arrested using a medium containing 120 mmol l<sup>-1</sup> potassium fluoride and 4.6 mmol l<sup>-1</sup> nitrilotriacetic acid. The homogenate supernatant was analysed for pHi and C<sub>CO<sub>2</sub></sub> using the same apparatus as for blood. C<sub>CO<sub>2</sub></sub> in cell water was calculated with the formulae derived by Pörtner *et al.* (1990). These authors used a Donnan factor of 1.05 adopted from mammals but, because of the low plasma protein content of tadpoles (Herner and Frieden, 1960), it is here approximated as 1.03. Intracellular P<sub>CO<sub>2</sub></sub> and [HCO<sub>3</sub><sup>-</sup>] were calculated as described for plasma. The values for cell water pK' and α<sub>CO<sub>2</sub></sub> were determined according to the formulae of Heisler (1989).

Calcium concentrations in tissue fluids and ambient water were determined by atomic absorption spectrophotometry

(Perkin-Elmer 2380). Total ammonia content was determined by the phenol-hypochlorite method of Solorzano (1969).

The results are presented as means  $\pm$  S.E.M. Differences between groups were assessed using two-way analysis of variance (ANOVA) followed by the Tukey test. Differences were accepted to be significant at  $P < 0.05$ .

## Results

### Acid-base parameters in tadpoles

Exposure to 2% or 5% environmental  $\text{CO}_2$  for 2 h caused a rise in blood  $P_{\text{CO}_2}$  from 3.3 to 18.1 and 35.7 mmHg, respectively, and decreased plasma pH from 7.85 to 7.35 and 7.19, respectively (all changes significant) (Fig. 1). Between 2 h and 24 h, plasma  $[\text{HCO}_3^-]$  increased significantly at constant  $P_{\text{CO}_2}$ , which resulted in an extracellular pH compensation of 85% and 65% (compared with the pH corresponding to the normocapnic bicarbonate concentration and hypercapnic  $P_{\text{CO}_2}$ ; see Claiborne and Heisler, 1986) in the 2% and 5%  $\text{CO}_2$  groups, respectively (Fig. 1). During progressive hypercapnia (48 h at 5%  $\text{CO}_2$  followed by 24 h at 8%  $\text{CO}_2$ ), plasma  $[\text{HCO}_3^-]$  increased to 46 mmol l<sup>-1</sup>, effecting a 65% pH compensation (Fig. 1).

Intracellular pH in tail muscle decreased significantly from 7.18 to 7.07 after 2 h of exposure to 2%  $\text{CO}_2$  (Fig. 2). Exposure to 5%  $\text{CO}_2$  caused a similar decrease in pH<sub>i</sub> despite the higher  $P_{\text{CO}_2}$ . This was due to a larger increase in intracellular  $[\text{HCO}_3^-]$  in the 5% group than in the 2% group (Fig. 2). After 24 h, muscle pH<sub>i</sub> was completely restored to control values in both groups. In the liver, pH<sub>i</sub> fell significantly from 7.00 $\pm$ 0.02 ( $N=8$ ) to 6.86 $\pm$ 0.02 ( $N=7$ ) after 2 h of exposure to 2%  $\text{CO}_2$ . After 24 h, liver pH<sub>i</sub> had returned to control values (7.03 $\pm$ 0.03,  $N=7$ ).

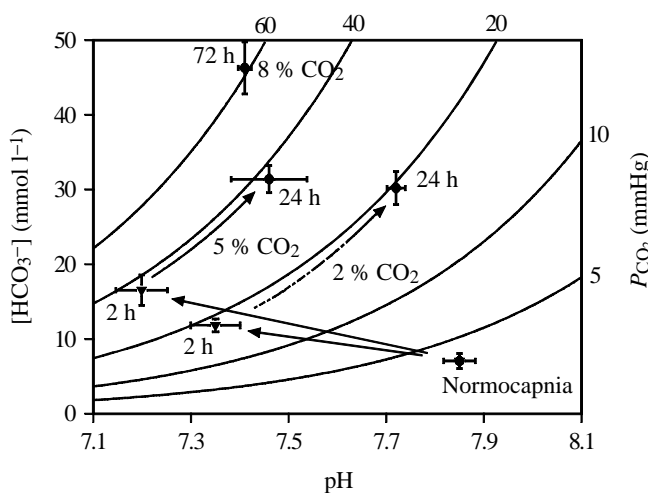

Fig. 1. Davenport diagram with calculated  $P_{\text{CO}_2}$  isopleths, showing changes in extracellular acid-base parameters in tadpoles following exposure to 2% and 5%  $\text{CO}_2$  for 2 and 24 h, and progressive hypercapnia to a final level of 8%  $\text{CO}_2$  after 72 h. Arrows indicate expected *in vivo* changes. Means  $\pm$  S.E.M.,  $N=5-8$  for individual points. 1 mmHg=0.1333 kPa.

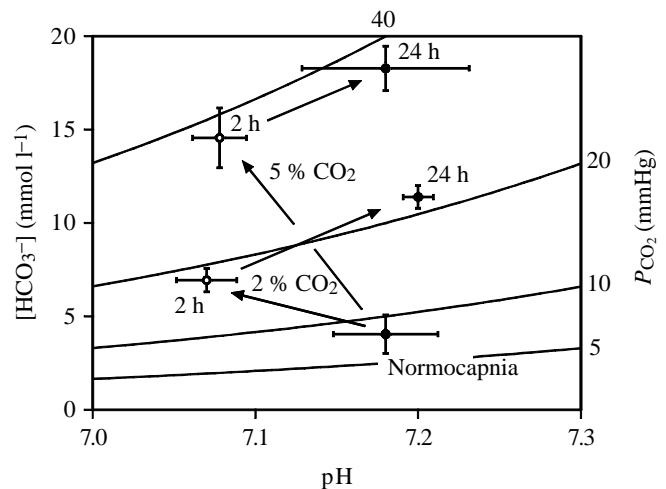

Fig. 2. Davenport diagram with calculated  $P_{\text{CO}_2}$  isopleths, showing changes in intracellular acid-base parameters in tail muscle from tadpoles subjected to different levels of environmental hypercapnia. Arrows indicate expected *in vivo* changes. Means  $\pm$  S.E.M.,  $N=5-10$ . 1 mmHg=0.1333 kPa.

### Tissue water and $\text{Ca}^{2+}$ distribution

Fractional tissue water content ( $F_{\text{tw}}$ ) was approximately 90% of total tissue mass, and 33% of  $F_{\text{tw}}$  was extracellular fluid ( $Q$ ). Neither total tissue water content nor the distribution of water between the extra- and intracellular compartments was affected by exposure to hypercapnia. Hypercapnia had no significant effects on body fluid  $[\text{Ca}^{2+}]$ . Extracellular  $[\text{Ca}^{2+}]$  was 1.07 $\pm$ 0.13 mmol l<sup>-1</sup> ( $N=6$ ) in normocapnic tadpoles and 1.44 $\pm$ 0.26 mmol l<sup>-1</sup> ( $N=9$ ) in hypercapnic (5%  $\text{CO}_2$ ) animals, and the corresponding intracellular  $\text{Ca}^{2+}$  concentrations were 0.66 $\pm$ 0.04 mmol l<sup>-1</sup> cell water ( $N=8$ ) and 0.44 $\pm$ 0.10 mmol l<sup>-1</sup> cell water ( $N=9$ ) respectively.

### Transepithelial fluxes of acid-base equivalents

Normocapnic tadpoles had a low steady-state  $\text{H}^+$ -equivalent excretion rate of 271 $\pm$ 73  $\mu\text{mol h}^{-1} \text{kg}^{-1}$  (slope of dotted line in Fig. 3), composed of a total ammonia efflux rate of 232 $\pm$ 31  $\mu\text{mol h}^{-1} \text{kg}^{-1}$  and an apparent bicarbonate uptake rate of 39 $\pm$ 72  $\mu\text{mol h}^{-1} \text{kg}^{-1}$ . A similar net rate of  $\text{H}^+$  excretion was seen in the control period of the hypercapnic experiments (Fig. 3, filled line before time zero). Upon exposure to 5%  $\text{CO}_2$ , the small excretion of  $\text{H}^+$  equivalents changed significantly to a large excretion of  $\text{HCO}_3^-$  equivalents, rising to 13 mmol  $\text{kg}^{-1}$  after 4–6 h. The ammonia excretion rate was not affected by hypercapnia. Net base excretion reached a maximal rate of 9151  $\mu\text{mol h}^{-1} \text{kg}^{-1}$  between 0.5 and 1 h of hypercapnia (Fig. 3, filled line, slope between 0.5 and 1 h). After some 4–6 h, the net excretion of  $\text{HCO}_3^-$  equivalents changed to a slow net release of  $\text{H}^+$  equivalents, which was not significantly different from the normocapnic  $\text{H}^+$  excretion rate.

Re-exposure of the same tadpoles to hypercapnia after 1–3 weeks of recovery under normocapnic conditions resulted in much smaller changes in transepithelial fluxes of acid-base

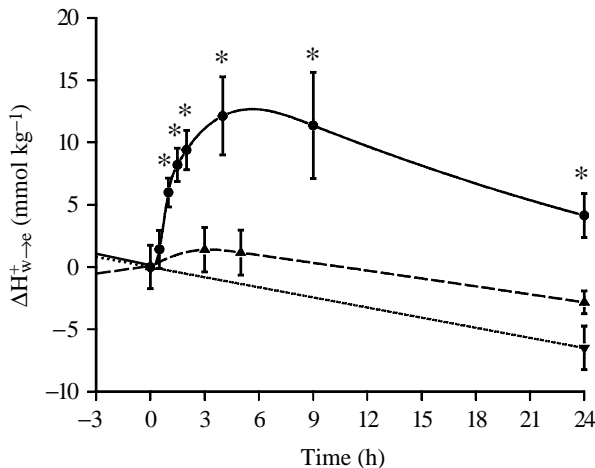

Fig. 3. Cumulative net transfer of  $H^+$  equivalents from the water to the extracellular space of tadpoles ( $\Delta H_{w \rightarrow e}^+$ , a positive value being equivalent to net acid uptake or net base excretion), calculated as the difference between  $\Delta[HCO_3^-]_{\text{water}}$  and  $\Delta[NH_3+NH_4^+]_{\text{water}}$ . The dotted line is for normocapnic control tadpoles, the solid line is for the first exposure of tadpoles to 5%  $CO_2$  (time 0 indicates the onset of hypercapnia) and the dashed line is for the second exposure of tadpoles to 5%  $CO_2$  after 1–3 weeks of recovery in normocapnic water. Means  $\pm$  S.E.M. (the numbers of experiments were 6, 5 and 4 for normocapnic, first and second exposures to hypercapnia, respectively, and four tadpoles participated in each experiment). Asterisks indicate a significant difference from the cumulative normocapnic net transfer of  $H^+$  equivalent at a given time ( $P < 0.05$ ).

equivalents, and the net transfer of  $H^+$  was not significantly different from the steady-state excretion (Fig. 3, dashed line).

During normocapnia there was a non-significant  $Ca^{2+}$  uptake of  $39 \pm 96 \mu\text{mol h}^{-1} \text{kg}^{-1}$  ( $N=6$ , evaluated from the 24 h normocapnic experiments). Exposure to 5%  $CO_2$  significantly changed the flux to a large  $Ca^{2+}$  efflux of  $393 \pm 102 \mu\text{mol h}^{-1} \text{kg}^{-1}$  ( $N=5$ , averaged over the 24 h first-time exposure to hypercapnia).

## Discussion

### Extra- and intracellular acid–base parameters

The acid–base status of normocapnic tadpoles of *Rana catesbeiana* at 20 °C was close to the values reported by Just *et al.* (1973) at 23 °C. Tadpoles have three areas for gas exchange (skin, gills and lungs), but the blood  $P_{CO_2}$  of 3.3 mmHg (Fig. 1) is low, as in exclusively water-breathing animals, reflecting the fact that  $CO_2$  exchange with air across the lung epithelium is not important in unstressed animals. This is in line with the finding of Burggren and West (1982) that less than 5% of metabolically produced  $CO_2$  is eliminated across the lungs of *Rana catesbeiana* tadpoles. The normocapnic extracellular pH of 7.85 (Fig. 1) and the intracellular pH in muscle of 7.18 (Fig. 2) are similar to values in adult frogs at the same experimental temperature (Wood *et al.* 1989), reflecting complete pH compensation of the internal

hypercapnia that accompanies the increased dependency on lung gas exchange during the climax of metamorphosis (Burggren and West, 1982).

After the onset of hypercapnia, there was an initial (0–2 h) extracellular respiratory acidosis followed by a compensatory accumulation of bicarbonate at constant  $P_{CO_2}$  (2–24 h) (Fig. 1). Tadpoles subjected to 2%  $CO_2$  or 5%  $CO_2$  for 24 h elevated their plasma  $[HCO_3^-]$  to the same level of approximately  $30 \text{ mmol l}^{-1}$  (Fig. 1). The rise in  $[HCO_3^-]$  resulted in a higher degree of pH compensation (85 and 65% at 2% and 5%  $CO_2$ , respectively) than is observed in most adult aquatic amphibians (0–30%) (Boutilier *et al.* 1992). Tadpoles exposed to progressive hypercapnia to a final level of 8%  $CO_2$  increased their plasma  $[HCO_3^-]$  to  $46 \text{ mmol l}^{-1}$  (Fig. 1), which is above the proposed upper bicarbonate level in amphibians of 22–33  $\text{mmol l}^{-1}$  (Heisler, 1986) but similar to the value in adult *Rana catesbeiana* at 8%  $CO_2$  (Toews and Stiffler, 1990).

During environmental hypercapnia, intracellular pH compensation was more complete than extracellular compensation. Full pH normalisation was recorded in tail muscle tissue (Fig. 2) and liver tissue at all levels of  $CO_2$ , reflecting the priority for intracellular pH restoration (Boutilier *et al.* 1992). Intracellular pH compensation lasted longer than 2 h, even though mobilisation of internal buffer base reserves, in principle, could have compensated the acidosis within 2 h by being transferred to the intracellular space rather than to the environment (see below).

### Transepithelial transfer of acid–base equivalents

Exposure to hypercapnia changed a small net release of  $H^+$  equivalents in normocapnic tadpoles to a large release of  $HCO_3^-$  (uptake of  $H^+$  equivalents) (Fig. 3) and  $Ca^{2+}$ , indicating dissolution of calcium stores in the paravertebral lime sacs and/or the skin. A 1:2 molar relationship between the summed changes in  $Ca^{2+}$  levels and base excess in the body fluids and environmental water would support this hypothesis. The measurements of calcium levels in extracellular fluid and muscle cell water suggested that the change in total body fluid  $Ca^{2+}$  was marginal; the amount of  $Ca^{2+}$  liberated from  $CaCO_3$  deposits during 24 h of exposure to 5%  $CO_2$  approximates the  $9.4 \text{ mmol kg}^{-1}$  released to the water. In the same period, there was a release of  $10.6 \text{ mmol kg}^{-1}$   $HCO_3^-$  equivalents to the water (corrected for the normocapnic excretion of  $H^+$  equivalents). Assuming that the complete pH restoration in liver and tail muscle applies to all intracellular compartments, information on intracellular non-bicarbonate buffer values are not needed to calculate the change in base excess of the body fluids. It is, however, necessary to make assumptions about the size of body compartments. A total body water content of 90% (determined for *Rana catesbeiana* tadpoles by Cecil and Just, 1979) and the blood volume of 5.4% for adult *Rana catesbeiana* (Thorson, 1964) were adopted. Tissue water distribution was approximated using values for tail muscle. An estimate of the intracellular change in base excess was

Table 1. Calculated changes in body fluid base excess and net transfer of bicarbonate equivalents from the animal to the environment in response to the transition from normocapnia to hypercapnia (5% CO<sub>2</sub>) for 24 h

| Variable                                                  | Method of calculation                                                                                                                                       | Change (mmol kg <sup>-1</sup> ) |
|-----------------------------------------------------------|-------------------------------------------------------------------------------------------------------------------------------------------------------------|---------------------------------|
| Blood                                                     | $V_{\text{blood}} \times (\Delta[\text{HCO}_3^-]_{\text{plasma}} + \beta_{\text{NC,plasma}} \times \Delta\text{pH}_{\text{plasma}} \times F_{\text{CO}_2})$ | 0.7                             |
| Interstitial fluid                                        | $V_{\text{inter}} \times 1.03 \times \Delta[\text{HCO}_3^-]_{\text{plasma}}$                                                                                | 5.8                             |
| Intracellular fluid                                       | $V_{\text{intra}} \times \Delta[\text{HCO}_3^-]_{\text{tail muscle}}$                                                                                       | 8.0                             |
| Release to environment                                    | $\Delta\text{H}_{\text{w} \rightarrow \text{e}}^+(\text{hypercapnia}) - \Delta\text{H}_{\text{w} \rightarrow \text{e}}^+(\text{normocapnia})$               | 10.6                            |
| Total change in base excess (body fluids and environment) |                                                                                                                                                             | 25.1                            |

$F_{\text{CO}_2}$  is the ratio between total CO<sub>2</sub> contents in blood and plasma;  $V_{\text{blood}}$ ,  $V_{\text{inter}}$  and  $V_{\text{intra}}$  are the blood, interstitial fluid and intracellular fluid volumes, respectively;  $\beta_{\text{NC,plasma}}$  is the true plasma non-bicarbonate buffer value;  $\Delta\text{H}_{\text{w} \rightarrow \text{e}}^+$  is the net transfer of H<sup>+</sup> equivalents from water to the extracellular space.

obtained by assuming that the tail muscle tissue is representative of the total intracellular space (Fig. 2). The true plasma buffer value was adopted from Just *et al.* (1973), and the buffer value in interstitial fluid was assumed to be negligible. The calculated changes in base excess in body compartments and ambient water are shown in Table 1.

In view of the many assumptions involved, the summed change in base excess of 25.1 mmol kg<sup>-1</sup> was fairly close to the 18.8 mmol kg<sup>-1</sup> bicarbonate equivalents created by dissolution of 9.4 mmol kg<sup>-1</sup> CaCO<sub>3</sub>, supporting the hypothesis that dissolution of internal CaCO<sub>3</sub> buffer stores is a major event during exposure to hypercapnia.

Tadpoles that were re-exposed to hypercapnia after 1–3 weeks of recovery in normocapnic water only showed a very small loss of bicarbonate (Fig. 3), suggesting that the labile CaCO<sub>3</sub> buffer reserves had been almost fully depleted during the first exposure to hypercapnia and that the CaCO<sub>3</sub> reserves are refilled slowly, if at all.

It is likely that the high  $P_{\text{CO}_2}$  mediates the dissolution of carbonates by increasing [H<sup>+</sup>] at the CaCO<sub>3</sub> crystal surfaces (Arends *et al.* 1982). A respiratory acidosis is easily transferred to the crystal surfaces in the lime sacs/skin by CO<sub>2</sub> diffusion, even if they are covered by cell membranes (e.g. osteoclasts). This makes calcium reserves especially susceptible during a respiratory acidosis. Tadpoles experience a large rise in internal  $P_{\text{CO}_2}$  during the climax of metamorphosis, but the hypercapnia develops slowly, and bicarbonate mobilised from CaCO<sub>3</sub> stores can probably be retained in the body fluids by appropriate changes in regulatory mechanisms.

Supported by the Danish Natural Science Research Council.

## References

- ARENDS, J., CHRISTOFFERSON, J., ELLIOT, J. C., GEBHARDT, M. A. H., RAISZ, L. G., SCHÄFER, H. AND SCHMIDT, K. H. (1982). Mechanisms of normal and pathological demineralisation. In *Biological Mineralization and Demineralization* (ed. G. H. Nancollas), pp. 389–398. Berlin: Springer.
- BALDWIN, G. F. AND BENTLEY, P. J. (1980). Calcium metabolism in bullfrog tadpoles (*Rana catesbeiana*). *J. exp. Biol.* **88**, 357–365.
- BOUTILIER, R. G., STIFFLER, D. F. AND TOEWS, D. P. (1992). Exchange of respiratory gases, ions and water in amphibious and aquatic amphibians. In *Environmental Physiology of the Amphibians* (ed. M. E. Feder and W. W. Burggren), pp. 81–124. Chicago: The University of Chicago Press.
- BURGGREN, W. W. AND WEST, N. H. (1982). Changing respiratory importance of gills, lungs and skin during metamorphosis in the bullfrog, *Rana catesbeiana*. *Respir. Physiol.* **47**, 151–164.
- CAMERON, J. N. (1971). A rapid method for determination of total carbon dioxide in small blood samples. *J. appl. Physiol.* **31**, 632–634.
- CECIL, S. G. AND JUST, J. J. (1979). Survival rate, population density and development of a naturally occurring anorak larva (*Rana catesbeiana*). *Copeia* **16**, 447–453.
- CLAIBORNE, J. B. AND HEISLER, N. (1986). Acid–base regulation and ion transfers in the carp (*Cyprinus carpio*): pH compensation during graded long- and short-term environmental hypercapnia and the effect of bicarbonate infusion. *J. exp. Biol.* **138**, 221–231.
- HEISLER, N. (1986). Comparative aspects of acid–base regulation. In *Acid–Base Regulation in Animals* (ed. N. Heisler), pp. 397–450. Amsterdam: Elsevier.
- HEISLER, N. (1989). Parameters and methods in acid–base physiology. In *Techniques in Comparative Respiratory Physiology: an Environmental Approach* (ed. C. R. Bridges and P. J. Butler), pp. 305–332. Cambridge: Cambridge University Press.
- HEISLER, N., FORCHT, G., ULTSCH, G. R. AND ANDERSON, J. F. (1982). Acid–base regulation in response to environmental hypercapnia in two aquatic salamanders, *Siren lacertina* and *Amphiuma means*. *Respir. Physiol.* **49**, 141–158.
- HERNER, A. E. AND FRIEDEN, E. (1960). Biochemistry of anuran metamorphosis. VII. Changes in serum proteins during spontaneous and induced metamorphosis. *J. biol. Chem.* **235**, 2845–2851.
- JUST, J. J., GATZ, R. N. AND CRAWFORD, E. C. (1973). Changes in respiratory functions during metamorphosis of the bullfrog, *Rana catesbeiana*. *Respir. Physiol.* **17**, 276–282.
- LING, G. N. AND WALTON, C. L. (1975). A simple rapid method for the quantitative separation of the extracellular fluid in frog muscles. *Physiol. Chem. Phys.* **7**, 215–218.
- MAAS, J. H., RISPENS, A. P., SIGGAARD-ANDERSEN, O. AND ZIJLSTRA, G. W. (1984). On the reliability of the Henderson–Hasselbalch equation in routine clinical acid–base chemistry. *Ann. clin. Biochem.* **21**, 26–39.
- PILKINGTON, J. B. AND SIMKISS, K. (1966). The mobilisation of the calcium carbonate deposits in the endolymphatic sacs of metamorphosing frogs. *J. exp. Biol.* **45**, 329–341.
- PÖRTNER, H.-O., BOUTILIER, R. G., TANG, Y. AND TOEWS, D. P. (1990). Determination of intracellular pH and  $P_{\text{CO}_2}$  after metabolic inhibition with fluoride and nitrilotriacetic acid. *Respir. Physiol.* **81**, 255–274.
- SOLORZANO, L. (1969). Determination of ammonia in natural waters by the phenol hypochlorite method. *Limnol. Oceanogr.* **14**, 799–801.

- STIFFLER, D. F., TUFTS, B. L. AND TOEWS, D. P. (1983). Acid-base and ionic balance in *Ambystoma tigrinum* and *Necturus maculosus* during hypercapnia. *Am. J. Physiol.* **245**, R689–R694.
- TAYLOR, A. C. AND KOLLROS, J. (1946). Stages in the normal development of *Rana pipiens* larvae. *Anat. Rev.* **94**, 7–23.
- THORSON, T. B. (1964). The partitioning of body water in Amphibia. *Physiol. Zool.* **37**, 395–399.
- TOEWS, D. P. AND BOUTILIER, R. G. (1986). Acid–base regulation in the Amphibia. In *Acid–Base Regulation in Animals* (ed. N. Heisler), pp. 266–308. Amsterdam: Elsevier.
- TOEWS, D. P. AND STIFFLER, D. F. (1990). Compensation of progressive hypercapnia in the toad *Bufo marinus* and the bullfrog *Rana catesbeiana*. *J. exp. Biol.* **148**, 293–302.
- WOOD, C. M., MUNGER, R. S. AND TOEWS, D. P. (1989). Ammonia, urea and H<sup>+</sup> distribution and the evolution of ureotelism in amphibians. *J. exp. Biol.* **144**, 215–233.
